# Supplementary material for: Payments by US pharmaceutical and medical device manufacturers to US medical journal editors: retrospective observational study
Source: PubMed Central journal article supplement — BMJ. 2017 Oct 26;359:j4619. doi: 10.1136/bmj.j4619 (PMC5655612; doi:10.1136/bmj.j4619), 2017-10-26

## **Appendix 1. Email template sent to editors-in-chiefs of 52 journals.**

Dear Dr. X:

We are hoping for your assistance with a research study.

Briefly, we are University of Toronto researchers studying how medical journals address and manage potential financial conflicts-of-interest (COI) for editors. We are contacting you as editor-in-chief to get your input about how your journal handles financial relationships among your editors.

Specifically, we will be comparing the names of editors with publicly available information about financial relationships with entities that could pose a conflict of interest such as pharmaceutical companies, device manufacturers or government agencies.

We are asking you to complete a brief (less than 5-minute) survey - you will receive a separate email with this link shortly.

In addition, from your journal's current masthead, attached is a list of all physician editors at the Associate Editor level or above. We ask that you review the list and if you have any corrections or clarifications, we would appreciate you emailing this list back to us.

This project has received appropriate research ethics board approval from the University of Toronto (Mount Sinai Hospital).

Thank you for your consideration.

We ask that this survey be completed and returned to us within two weeks. A reminder email will be sent after 2 weeks.

Should you have any questions or comments, please feel free to contact us. Completed attachments can be returned to us via email at X. We are happy to answer any questions by email or by telephone at X.

**Appendix 2. Template of editor list emailed to Editors-in-Chief of 52 journals.**

Dear Dr. XX,

Below is a list of all physician editors at the Associate Editor level or above as listed on your online masthead in May 2016 (not including Emeritus status) for your journal. **Do the listed editors play a role in key manuscript decision making and publication?**

Journal Name: XX

Editor-in-chief: XX

| Editor Name | Title            | Active in manuscript review and publication? |    | Comments |
|-------------|------------------|----------------------------------------------|----|----------|
|             |                  | Yes                                          | No |          |
| 1.          | Editor in Chief  |                                              |    |          |
| 2.          | Editor in Chief  |                                              |    |          |
| 3.          | Deputy Editor    |                                              |    |          |
| 4.          | Associate Editor |                                              |    |          |

**Have we omitted any of your editors with key manuscript decision making and publication roles?**

If so, please include their names, and if possible, titles, below:

| Editor Name | Title | Comments |
|-------------|-------|----------|
|             |       |          |
|             |       |          |
|             |       |          |
|             |       |          |

Thank you very much for your response. If you have any questions or concerns, please don't hesitate to contact us at XX or by telephone at XX.

### **Appendix 3. Online survey sent to Editors-in-Chief of 52 journals.**

1. Does your journal have a formal written policy for editors with respect to consulting and collaboration with industry (drug and device makers)? [Yes/No/Unsure]
2. Is this policy publicly available? [Yes/No/Unsure]
3. If you answered YES to question 2, please provide a website link to this policy in the space below:
4. If you answered NO to question 2, would you be able to send this policy to us as an email attachment? [Yes/No/Unsure]
5. Does your journal require that all editors complete an annual financial disclosure statement listing consulting payments, honoraria, and such? [Yes/No/Unsure]
6. Do you require that editors disclose potential conflict of interest (COI) when publication decisions are being made about individual articles? [Yes/No/Unsure]
7. Who decides whether a potential COI precludes an editor from the discussion a given manuscript? (check all that apply) [Editor with the COI/Editor in Chief/Someone else (and if so, please specify)]
8. On a scale of 1-5, how satisfied are you that your journal handles editorial COI well? [1=not at all satisfied; 5=extremely satisfied]
9. Thank you. As you know, we also emailed you a list of your journal editors that we pulled from your web site and masthead.

As the final part of our survey, we ask you to review the list of editors. Have you already done this?  
[Yes/No]

10. Please enter the name of your journal:

**Appendix 4. General and total research payments (\$USD) to individual editors, by journal (2014).**

| <b>Journal Name</b>             | <b>Editor</b> | <b>Open Payments Eligible (Yes = Y, No = N)</b> | <b>General Payments (\$)</b> | <b>Total Research Payments (Research + Associated Research Funding) (\$)</b> |
|---------------------------------|---------------|-------------------------------------------------|------------------------------|------------------------------------------------------------------------------|
| New England Journal of Medicine | 1.            | Y                                               | 0                            | 0                                                                            |
| New England Journal of Medicine | 2.            | Y                                               | 0                            | 0                                                                            |
| New England Journal of Medicine | 3.            | Y                                               | 0                            | 0                                                                            |
| New England Journal of Medicine | 4.            | Y                                               | 0                            | 0                                                                            |
| New England Journal of Medicine | 5.            | Y                                               | 0                            | 0                                                                            |
| New England Journal of Medicine | 6.            | Y                                               | 0                            | 0                                                                            |
| New England Journal of Medicine | 7.            | Y                                               | 0                            | 0                                                                            |
| New England Journal of Medicine | 8.            | N                                               | -                            | -                                                                            |
| New England Journal of Medicine | 9.            | Y                                               | 0                            | 0                                                                            |
| New England Journal of Medicine | 10.           | Y                                               | 0                            | 0                                                                            |
| New England Journal of Medicine | 11.           | Y                                               | 300                          | 0                                                                            |
| New England Journal of Medicine | 12.           | Y                                               | 0                            | 0                                                                            |
| New England Journal of Medicine | 13.           | Y                                               | 0                            | 0                                                                            |
| New England Journal of Medicine | 14.           | Y                                               | 0                            | 0                                                                            |
| New England Journal of Medicine | 15.           | Y                                               | 0                            | 0                                                                            |
| New England Journal of Medicine | 16.           | Y                                               | 2,289                        | 0                                                                            |
| New England Journal of Medicine | 17.           | Y                                               | 0                            | 0                                                                            |
| New England Journal of Medicine | 18.           | Y                                               | 0                            | 0                                                                            |
| New England Journal of Medicine | 19.           | N                                               | -                            | -                                                                            |
| New England Journal of Medicine | 20.           | N                                               | -                            | -                                                                            |
| New England Journal of Medicine | 21.           | Y                                               | 0                            | 0                                                                            |
| New England Journal of Medicine | 22.           | N                                               | -                            | -                                                                            |
| New England Journal of Medicine | 23.           | Y                                               | 0                            | 0                                                                            |
| New England Journal of Medicine | 24.           | Y                                               | 0                            | 0                                                                            |
| New England Journal of Medicine | 25.           | N                                               | -                            | -                                                                            |

|                                             |     |   |        |           |
|---------------------------------------------|-----|---|--------|-----------|
| New England Journal of Medicine             | 26. | N | -      | -         |
| Journal of the American Medical Association | 1.  | Y | 14     | 0         |
| Journal of the American Medical Association | 2.  | Y | 0      | 0         |
| Journal of the American Medical Association | 3.  | Y | 0      | 0         |
| Journal of the American Medical Association | 4.  | Y | 40     | 0         |
| Journal of the American Medical Association | 5.  | Y | 0      | 0         |
| Journal of the American Medical Association | 6.  | Y | 13     | 0         |
| Journal of the American Medical Association | 7.  | Y | 0      | 0         |
| Journal of the American Medical Association | 8.  | Y | 0      | 0         |
| Journal of the American Medical Association | 9.  | Y | 0      | 0         |
| Journal of the American Medical Association | 10. | Y | 28     | 1,348,270 |
| Journal of the American Medical Association | 11. | Y | 26,084 | 0         |
| Journal of the American Medical Association | 12. | Y | 0      | 12,451    |
| Journal of the American Medical Association | 13. | N | -      | -         |
| Journal of the American Medical Association | 14. | Y | 0      | 0         |
| Journal of the American Medical Association | 15. | Y | 0      | 0         |
| Journal of the American Medical Association | 16. | Y | 0      | 0         |
| Journal of the American Medical Association | 17. | Y | 0      | 0         |
| Journal of the American Medical Association | 18. | Y | 228    | 0         |
| Journal of the American Medical Association | 19. | Y | 1,070  | 0         |
| Journal of the American Medical Association | 20. | Y | 0      | 0         |
| Journal of the American Medical Association | 21. | Y | 0      | 0         |
| Journal of the American Medical Association | 22. | Y | 0      | 0         |
| Journal of the American Medical Association | 23. | Y | 60     | 0         |
| Journal of the American Medical Association | 24. | Y | 0      | 0         |
| Journal of the American Medical Association | 25. | Y | 0      | 0         |
| Journal of the American Medical Association | 26. | Y | 78,617 | 0         |
| Journal of the American Medical Association | 27. | Y | 53,998 | 1,258,313 |
| Journal of the American Medical Association | 28. | Y | 0      | 0         |
| Journal of the American Medical Association | 29. | Y | 404    | 0         |
| Journal of the American Medical Association | 30. | Y | 0      | 0         |
| Journal of the American Medical Association | 31. | Y | 0      | 0         |

|                                             |     |   |        |         |
|---------------------------------------------|-----|---|--------|---------|
| Journal of the American Medical Association | 32. | Y | 35,713 | 975     |
| Journal of the American Medical Association | 33. | N | -      | -       |
| Annals of Internal Medicine                 | 1.  | Y | 0      | 0       |
| Annals of Internal Medicine                 | 2.  | Y | 20     | 0       |
| Annals of Internal Medicine                 | 3.  | Y | 0      | 0       |
| Annals of Internal Medicine                 | 4.  | Y | 0      | 0       |
| Annals of Internal Medicine                 | 5.  | Y | 0      | 0       |
| Annals of Internal Medicine                 | 6.  | Y | 0      | 0       |
| Annals of Internal Medicine                 | 7.  | Y | 0      | 0       |
| Annals of Internal Medicine                 | 8.  | Y | 0      | 0       |
| Annals of Internal Medicine                 | 9.  | Y | 149    | 0       |
| Annals of Internal Medicine                 | 10. | Y | 35     | 0       |
| Annals of Internal Medicine                 | 11. | Y | 0      | 0       |
| Annals of Internal Medicine                 | 12. | Y | 0      | 0       |
| Annals of Internal Medicine                 | 13. | Y | 0      | 4,287   |
| Annals of Internal Medicine                 | 14. | Y | 0      | 0       |
| Annals of Internal Medicine                 | 15. | Y | 795    | 0       |
| Annals of Internal Medicine                 | 16. | Y | 0      | 0       |
| Annals of Internal Medicine                 | 17. | Y | 0      | 0       |
| Annals of Internal Medicine                 | 18. | Y | 0      | 0       |
| Annals of Internal Medicine                 | 19. | Y | 0      | 0       |
| Annals of Internal Medicine                 | 20. | N | -      | -       |
| Annals of Internal Medicine                 | 21. | N | -      | -       |
| Annals of Internal Medicine                 | 22. | N | -      | -       |
| Annals of Internal Medicine                 | 23. | N | -      | -       |
| JAMA Internal Medicine                      | 1.  | Y | 136    | 0       |
| JAMA Internal Medicine                      | 2.  | Y | 200    | 0       |
| JAMA Internal Medicine                      | 3.  | Y | 18     | 0       |
| JAMA Internal Medicine                      | 4.  | Y | 0      | 0       |
| JAMA Internal Medicine                      | 5.  | Y | 0      | 0       |
| JAMA Internal Medicine                      | 6.  | Y | 0      | 736,272 |
| Annals of Family Medicine                   | 1.  | Y | 0      | 0       |

|                           |     |   |        |         |
|---------------------------|-----|---|--------|---------|
| Annals of Family Medicine | 2.  | Y | 0      | 0       |
| Annals of Family Medicine | 3.  | Y | 0      | 0       |
| Annals of Family Medicine | 4.  | Y | 0      | 0       |
| Annals of Family Medicine | 5.  | Y | 0      | 0       |
| Annals of Family Medicine | 6.  | Y | 28     | 0       |
| Annals of Family Medicine | 7.  | Y | 13,733 | 275,166 |
| Annals of Family Medicine | 8.  | Y | 0      | 0       |
| Annals of Family Medicine | 9.  | Y | 0      | 0       |
| Annals of Family Medicine | 10. | N | -      | -       |
| Annals of Family Medicine | 11. | N | -      | -       |
| Annals of Family Medicine | 12. | Y | 0      | 0       |
| American Family Physician | 1.  | Y | 0      | 0       |
| American Family Physician | 2.  | Y | 0      | 0       |
| American Family Physician | 3.  | Y | 22     | 0       |
| American Family Physician | 4.  | Y | 0      | 0       |
| American Family Physician | 5.  | Y | 0      | 0       |
| American Family Physician | 6.  | Y | 0      | 0       |
| American Family Physician | 7.  | Y | 0      | 0       |
| American Family Physician | 8.  | Y | 10     | 0       |
| American Family Physician | 9.  | Y | 0      | 0       |
| American Family Physician | 10. | Y | 0      | 0       |
| American Family Physician | 11. | N | -      | -       |
| Pediatrics                | 1.  | Y | 0      | 0       |
| Pediatrics                | 2.  | Y | 0      | 0       |
| Pediatrics                | 3.  | Y | 0      | 0       |
| Pediatrics                | 4.  | Y | 0      | 0       |
| Pediatrics                | 5.  | Y | 2,600  | 0       |
| Pediatrics                | 6.  | Y | 2,544  | 0       |
| Pediatrics                | 7.  | Y | 0      | 0       |
| Pediatrics                | 8.  | Y | 0      | 0       |
| Pediatrics                | 9.  | Y | 0      | 0       |
| JAMA Pediatrics           | 1.  | Y | 0      | 0       |

|                                               |     |   |        |        |
|-----------------------------------------------|-----|---|--------|--------|
| JAMA Pediatrics                               | 2.  | Y | 0      | 0      |
| JAMA Pediatrics                               | 3.  | Y | 22     | 0      |
| JAMA Pediatrics                               | 4.  | Y | 0      | 0      |
| Obstetrics and Gynecology                     | 1.  | Y | 0      | 0      |
| Obstetrics and Gynecology                     | 2.  | Y | 0      | 0      |
| Obstetrics and Gynecology                     | 3.  | Y | 0      | 0      |
| American Journal of Obstetrics and Gynecology | 1.  | Y | 0      | 0      |
| American Journal of Obstetrics and Gynecology | 2.  | Y | 0      | 0      |
| American Journal of Obstetrics and Gynecology | 3.  | Y | 600    | 2,600  |
| American Journal of Obstetrics and Gynecology | 4.  | Y | 8,038  | 75,670 |
| American Journal of Obstetrics and Gynecology | 5.  | Y | 126    | 0      |
| American Journal of Obstetrics and Gynecology | 6.  | Y | 17     | 0      |
| American Journal of Obstetrics and Gynecology | 7.  | Y | 0      | 0      |
| American Journal of Obstetrics and Gynecology | 8.  | Y | 0      | 0      |
| American Journal of Obstetrics and Gynecology | 9.  | Y | 37     | 0      |
| American Journal of Obstetrics and Gynecology | 10. | Y | 155    | 0      |
| American Journal of Obstetrics and Gynecology | 11. | Y | 50     | 0      |
| American Journal of Obstetrics and Gynecology | 12. | Y | 0      | 0      |
| American Journal of Obstetrics and Gynecology | 13. | Y | 0      | 0      |
| American Journal of Obstetrics and Gynecology | 14. | Y | 0      | 0      |
| Anesthesiology                                | 1.  | Y | 0      | 0      |
| Anesthesiology                                | 2.  | Y | 15     | 0      |
| Anesthesiology                                | 3.  | N | -      | -      |
| Anesthesiology                                | 4.  | Y | 0      | 7,238  |
| Anesthesiology                                | 5.  | Y | 0      | 0      |
| Anesthesiology                                | 6.  | Y | 51,262 | 567    |
| Anesthesiology                                | 7.  | Y | 15,823 | 0      |
| Anesthesiology                                | 8.  | Y | 0      | 0      |
| Anesthesiology                                | 9.  | Y | 4,571  | 0      |
| Anesthesiology                                | 10. | N | -      | -      |
| Anesthesiology                                | 11. | N | -      | -      |
| Anesthesiology                                | 12. | N | -      | -      |



|                |     |   |        |        |
|----------------|-----|---|--------|--------|
| Anesthesiology | 13. | Y | 0      | 0      |
| Anesthesiology | 14. | Y | 38     | 0      |
| Anesthesiology | 15. | Y | 12,010 | 33,750 |
| Pain           | 1.  | N | -      | -      |
| Pain           | 2.  | Y | 0      | 0      |
| Pain           | 3.  | N | -      | -      |
| Pain           | 4.  | N | -      | -      |
| Pain           | 5.  | N | -      | -      |
| Pain           | 6.  | N | -      | -      |
| Pain           | 7.  | N | -      | -      |
| Pain           | 8.  | N | -      | -      |
| Pain           | 9.  | N | -      | -      |
| Pain           | 10. | N | -      | -      |
| Pain           | 11. | N | -      | -      |
| Pain           | 12. | N | -      | -      |
| Pain           | 13. | Y | 0      | 0      |
| Pain           | 14. | N | -      | -      |
| Pain           | 15. | N | -      | -      |
| Pain           | 16. | N | -      | -      |
| Pain           | 17. | Y | 5,215  | 0      |
| Pain           | 18. | N | -      | -      |
| Pain           | 19. | Y | 0      | -      |
| Pain           | 20. | N | -      | -      |
| Pain           | 21. | N | -      | -      |
| Pain           | 22. | N | -      | -      |
| Pain           | 23. | N | -      | -      |
| Pain           | 24. | N | -      | -      |
| Pain           | 25. | N | -      | -      |
| Pain           | 26. | N | -      | -      |
| Pain           | 27. | N | -      | -      |
| Pain           | 28. | Y | 4,162  | 62,500 |
| Pain           | 29. | N | -      | -      |

|      |     |   |        |         |
|------|-----|---|--------|---------|
| Pain | 30. | Y | 97,529 | 0       |
| Pain | 31. | Y | 34,081 | 323,323 |
| Pain | 32. | N | -      | -       |
| Pain | 33. | N | -      | -       |
| Pain | 34. | N | -      | -       |
| Pain | 35. | N | -      | -       |
| Pain | 36. | N | -      | -       |
| Pain | 37. | N | -      | -       |
| Pain | 38. | N | -      | -       |
| Pain | 39. | N | -      | -       |
| Pain | 40. | Y | 112    | 0       |
| Pain | 41. | N | -      | -       |
| Pain | 42. | N | -      | -       |
| Pain | 43. | N | -      | -       |
| Pain | 44. | N | -      | -       |
| Pain | 45. | N | -      | -       |
| Pain | 46. | N | -      | -       |
| Pain | 47. | N | -      | -       |
| Pain | 48. | N | -      | -       |
| Pain | 49. | N | -      | -       |
| Pain | 50. | N | -      | -       |
| Pain | 51. | N | -      | -       |
| Pain | 52. | N | -      | -       |
| Pain | 53. | N | -      | -       |
| Pain | 54. | Y | 928    | 0       |
| Pain | 55. | N | -      | -       |
| Pain | 56. | N | -      | -       |
| Pain | 57. | N | -      | -       |
| Pain | 58. | N | -      | -       |
| Pain | 59. | N | -      | -       |
| Pain | 60. | N | -      | -       |
| Pain | 61. | N | -      | -       |

|                                |     |   |       |        |
|--------------------------------|-----|---|-------|--------|
| Pain                           | 62. | N | -     | -      |
| Pain                           | 63. | Y | 0     | 0      |
| Pain                           | 64. | N | -     | -      |
| Pain                           | 65. | N | -     | -      |
| Pain                           | 66. | N | -     | -      |
| Pain                           | 67. | N | -     | -      |
| Pain                           | 68. | N | -     | -      |
| Pain                           | 69. | N | -     | -      |
| Pain                           | 70. | N | -     | -      |
| Pain                           | 71. | N | -     | -      |
| Pain                           | 72. | N | -     | -      |
| Pain                           | 73. | N | -     | -      |
| Pain                           | 74. | N | -     | -      |
| Pain                           | 75. | N | -     | -      |
| Pain                           | 76. | N | -     | -      |
| Pain                           | 77. | N | -     | -      |
| Pain                           | 78. | N | -     | -      |
| Pain                           | 79. | N | -     | -      |
| Pain                           | 80. | N | -     | -      |
| Pain                           | 81. | N | -     | -      |
| Pain                           | 82. | N | -     | -      |
| JAMA Psychiatry                | 1.  | Y | 7,912 | 0      |
| JAMA Psychiatry                | 2.  | Y | 0     | 1,800  |
| American Journal of Psychiatry | 1.  | Y | 0     | 0      |
| American Journal of Psychiatry | 2.  | Y | 24    | 0      |
| American Journal of Psychiatry | 3.  | Y | 0     | 0      |
| American Journal of Psychiatry | 4.  | Y | 0     | 0      |
| American Journal of Psychiatry | 5.  | Y | 0     | 24,524 |
| American Journal of Psychiatry | 6.  | Y | 4,877 | 0      |
| American Journal of Psychiatry | 7.  | Y | 0     | 0      |
| American Journal of Psychiatry | 8.  | N | -     | -      |
| American Journal of Psychiatry | 9.  | Y | 0     | 0      |

|                                |     |   |         |        |
|--------------------------------|-----|---|---------|--------|
| American Journal of Psychiatry | 10. | Y | 11,438  | 85,397 |
| American Journal of Psychiatry | 11. | Y | 0       | 90,649 |
| American Journal of Psychiatry | 12. | Y | 0       | 0      |
| American Journal of Psychiatry | 13. | Y | 0       | 0      |
| American Journal of Psychiatry | 14. | Y | 0       | 0      |
| American Journal of Psychiatry | 15. | Y | 17,797  | 832    |
| American Journal of Psychiatry | 16. | Y | 20,096  | 29,629 |
| American Journal of Psychiatry | 17. | Y | 0       | 0      |
| American Journal of Psychiatry | 18. | N | -       | -      |
| American Journal of Psychiatry | 19. | Y | 17,787  | 0      |
| American Journal of Psychiatry | 20. | N | -       | -      |
| American Journal of Psychiatry | 21. | Y | 20,600  | 325    |
| American Journal of Psychiatry | 22. | Y | 0       | 0      |
| American Journal of Psychiatry | 23. | Y | 0       | 0      |
| American Journal of Psychiatry | 24. | Y | 0       | 0      |
| Annals of Emergency Medicine   | 1.  | Y | 0       | 0      |
| Annals of Emergency Medicine   | 2.  | Y | 127,922 | 0      |
| Annals of Emergency Medicine   | 3.  | Y | 125     | 0      |
| Annals of Emergency Medicine   | 4.  | Y | 0       | 0      |
| Annals of Emergency Medicine   | 5.  | Y | 20      | 0      |
| Annals of Emergency Medicine   | 6.  | Y | 0       | 0      |
| Annals of Emergency Medicine   | 7.  | Y | 0       | 0      |
| Annals of Emergency Medicine   | 8.  | N | -       | -      |
| Annals of Emergency Medicine   | 9.  | Y | 0       | 0      |
| Annals of Emergency Medicine   | 10. | Y | 0       | 0      |
| Annals of Emergency Medicine   | 11. | Y | 85      | 0      |
| Annals of Emergency Medicine   | 12. | Y | 0       | 0      |
| Annals of Emergency Medicine   | 13. | Y | 0       | 0      |
| Annals of Emergency Medicine   | 14. | Y | 0       | 0      |
| Annals of Emergency Medicine   | 15. | Y | 0       | 0      |
| Annals of Emergency Medicine   | 16. | Y | 0       | 68,550 |
| Annals of Emergency Medicine   | 17. | Y | 0       | 0      |

|                                   |     |   |        |         |
|-----------------------------------|-----|---|--------|---------|
| Annals of Emergency Medicine      | 18. | Y | 5,956  | 19,783  |
| Annals of Emergency Medicine      | 19. | Y | 0      | 0       |
| Annals of Emergency Medicine      | 20. | Y | 0      | 0       |
| Annals of Emergency Medicine      | 21. | Y | 0      | 0       |
| Annals of Emergency Medicine      | 22. | Y | 0      | 0       |
| Annals of Emergency Medicine      | 23. | Y | 33     | 0       |
| Annals of Emergency Medicine      | 24. | Y | 22,712 | 17,503  |
| Annals of Emergency Medicine      | 25. | Y | 11     | 0       |
| Annals of Emergency Medicine      | 26. | Y | 11     | 0       |
| Annals of Emergency Medicine      | 27. | Y | 0      | 0       |
| Annals of Emergency Medicine      | 28. | Y | 24     | 0       |
| Annals of Emergency Medicine      | 29. | Y | 0      | 0       |
| Annals of Emergency Medicine      | 30. | Y | 0      | 0       |
| Annals of Emergency Medicine      | 31. | Y | 0      | 0       |
| Radiology                         | 1.  | Y | 0      | 0       |
| Radiology                         | 2.  | Y | 0      | 0       |
| Radiology                         | 3.  | Y | 0      | 0       |
| Radiology                         | 4.  | Y | 0      | 0       |
| Radiology                         | 5.  | Y | 77,366 | 0       |
| Radiology                         | 6.  | Y | 22,503 | 942,825 |
| Radiology                         | 7.  | Y | 11,726 | 6,372   |
| Radiology                         | 8.  | Y | 0      | 0       |
| Radiology                         | 9.  | Y | 0      | 0       |
| Radiology                         | 10. | Y | 3,997  | 0       |
| American Journal of Roentgenology | 1.  | Y | 0      | 0       |
| American Journal of Roentgenology | 2.  | Y | 0      | 0       |
| American Journal of Roentgenology | 3.  | Y | 0      | 0       |
| American Journal of Roentgenology | 4.  | Y | 0      | 0       |
| American Journal of Roentgenology | 5.  | Y | 100    | 0       |
| American Journal of Roentgenology | 6.  | Y | 0      | 0       |
| American Journal of Roentgenology | 7.  | Y | 0      | 0       |
| American Journal of Roentgenology | 8.  | Y | 72,852 | 0       |

|                                   |     |   |        |         |
|-----------------------------------|-----|---|--------|---------|
| American Journal of Roentgenology | 9.  | Y | 0      | 0       |
| American Journal of Roentgenology | 10. | Y | 0      | 0       |
| American Journal of Roentgenology | 11. | Y | 0      | 0       |
| American Journal of Roentgenology | 12. | Y | 0      | 0       |
| American Journal of Roentgenology | 13. | Y | 0      | 0       |
| American Journal of Roentgenology | 14. | Y | 204    | 0       |
| American Journal of Roentgenology | 15. | Y | 0      | 0       |
| American Journal of Roentgenology | 16. | Y | 0      | 0       |
| American Journal of Roentgenology | 17. | Y | 0      | 0       |
| American Journal of Roentgenology | 18. | Y | 0      | 0       |
| American Journal of Roentgenology | 19. | Y | 0      | 0       |
| American Journal of Roentgenology | 20. | Y | 0      | 0       |
| American Journal of Roentgenology | 21. | Y | 0      | 0       |
| American Journal of Roentgenology | 22. | Y | 6,360  | 0       |
| American Journal of Roentgenology | 23. | Y | 10,494 | 0       |
| American Journal of Roentgenology | 24. | Y | 17     | 0       |
| American Journal of Roentgenology | 25. | Y | 0      | 0       |
| American Journal of Roentgenology | 26. | Y | 0      | 0       |
| American Journal of Roentgenology | 27. | Y | 0      | 0       |
| American Journal of Roentgenology | 28. | Y | 0      | 0       |
| American Journal of Roentgenology | 29. | Y | 353    | 0       |
| American Journal of Roentgenology | 30. | Y | 349    | 0       |
| American Journal of Roentgenology | 31. | Y | 0      | 0       |
| American Journal of Roentgenology | 32. | Y | 0      | 0       |
| American Journal of Roentgenology | 33. | Y | 2,602  | 0       |
| Annals of Surgery                 | 1.  | Y | 0      | 0       |
| Annals of Surgery                 | 2.  | Y | 0      | 11,846  |
| Annals of Surgery                 | 3.  | Y | 0      | 0       |
| Annals of Surgery                 | 4.  | Y | 1,922  | 0       |
| Annals of Surgery                 | 5.  | N | -      | -       |
| Annals of Surgery                 | 6.  | Y | 0      | 0       |
| JAMA Surgery                      | 1.  | Y | 27     | 163,667 |

|                                               |     |   |            |           |
|-----------------------------------------------|-----|---|------------|-----------|
| JAMA Surgery                                  | 2.  | Y | 105        | 0         |
| JAMA Surgery                                  | 3.  | Y | 125        | 0         |
| JAMA Surgery                                  | 4.  | Y | 34         | 65,308    |
| Journal of the American College of Cardiology | 1.  | Y | 6,304      | 1,350,000 |
| Journal of the American College of Cardiology | 2.  | Y | 13,709     | 50,000    |
| Journal of the American College of Cardiology | 3.  | Y | 8,573      | 0         |
| Journal of the American College of Cardiology | 4.  | Y | 0          | 0         |
| Journal of the American College of Cardiology | 5.  | Y | 75,699     | 11,375    |
| Journal of the American College of Cardiology | 6.  | Y | 51,645     | 258,856   |
| Journal of the American College of Cardiology | 7.  | Y | 47,257     | 248,546   |
| Journal of the American College of Cardiology | 8.  | Y | 4,836      | 1,100     |
| Journal of the American College of Cardiology | 9.  | Y | 0          | 25,165    |
| Journal of the American College of Cardiology | 10. | Y | 98,829     | 1,381     |
| Journal of the American College of Cardiology | 11. | Y | 3,835      | 310,341   |
| Journal of the American College of Cardiology | 12. | Y | 0          | 0         |
| Journal of the American College of Cardiology | 13. | Y | 2,522      | 120,850   |
| Journal of the American College of Cardiology | 14. | N | -          | -         |
| Journal of the American College of Cardiology | 15. | Y | 0          | 12573     |
| Journal of the American College of Cardiology | 16. | Y | 368        | 0         |
| Journal of the American College of Cardiology | 17. | Y | 10,500     | 0         |
| Journal of the American College of Cardiology | 18. | Y | 11,481     | 21,807    |
| Journal of the American College of Cardiology | 19. | Y | 12,646     | 0         |
| Journal of the American College of Cardiology | 20. | Y | 10,981,153 | 0         |
| Journal of the American College of Cardiology | 21. | Y | 10,071     | 33,300    |
| Journal of the American College of Cardiology | 22. | Y | 6,199      | 17,530    |
| Journal of the American College of Cardiology | 23. | Y | 56,091     | 380       |
| Journal of the American College of Cardiology | 24. | N | -          | -         |
| Journal of the American College of Cardiology | 25. | Y | 0          | 0         |
| Journal of the American College of Cardiology | 26. | Y | 0          | 0         |
| Journal of the American College of Cardiology | 27. | N | -          | -         |
| Journal of the American College of Cardiology | 28. | N | -          | -         |
| Journal of the American College of Cardiology | 29. | N | -          | -         |

|                                               |     |   |        |         |
|-----------------------------------------------|-----|---|--------|---------|
| Journal of the American College of Cardiology | 30. | N | -      | -       |
| Journal of the American College of Cardiology | 31. | N | -      | -       |
| Journal of the American College of Cardiology | 32. | N | -      | -       |
| Journal of the American College of Cardiology | 33. | N | -      | -       |
| Journal of the American College of Cardiology | 34. | N | -      | -       |
| Journal of the American College of Cardiology | 35. | N | -      | -       |
| Circulation                                   | 1.  | Y | 61,872 | 0       |
| Circulation                                   | 2.  | Y | 1,250  | 0       |
| Circulation                                   | 3.  | Y | 31     | 0       |
| Circulation                                   | 4.  | Y | 77,305 | 374,731 |
| Circulation                                   | 5.  | Y | 0      | 0       |
| Circulation                                   | 6.  | Y | 357    | 0       |
| Circulation                                   | 7.  | Y | 0      | 0       |
| Circulation                                   | 8.  | N | -      | -       |
| Circulation                                   | 9.  | Y | 16     | 0       |
| Circulation                                   | 10. | Y | 0      | 0       |
| Circulation                                   | 11. | Y | 2,925  | 0       |
| Circulation                                   | 12. | Y | 0      | 0       |
| Circulation                                   | 13. | Y | 16,781 | 11,500  |
| Circulation                                   | 14. | Y | 81     | 0       |
| Circulation                                   | 15. | Y | 1,959  | 46      |
| Circulation                                   | 16. | Y | 26     | 736,272 |
| Circulation                                   | 17. | Y | 0      | 0       |
| Circulation                                   | 18. | Y | 9,269  | 0       |
| Circulation                                   | 19. | Y | 0      | 0       |
| Circulation                                   | 20. | Y | 83,782 | 988,538 |
| Circulation                                   | 21. | Y | 25,007 | 0       |
| Circulation                                   | 22. | Y | 2,805  | 0       |
| Circulation                                   | 23. | Y | 167    | 0       |
| Circulation                                   | 24. | Y | 4,372  | 0       |
| Circulation                                   | 25. | Y | 38,976 | 0       |
| Circulation                                   | 26. | Y | 0      | 0       |



|                                   |     |   |           |        |
|-----------------------------------|-----|---|-----------|--------|
| Circulation                       | 27. | Y | 34        | 0      |
| Circulation                       | 28. | Y | 162       | 0      |
| Circulation                       | 29. | Y | 0         | 0      |
| Journal of Bone and Joint Surgery | 1.  | Y | 3,176     | 0      |
| Journal of Bone and Joint Surgery | 2.  | N | -         | -      |
| Journal of Bone and Joint Surgery | 3.  | Y | 7,438     | 0      |
| Journal of Bone and Joint Surgery | 4.  | N | -         | -      |
| Journal of Bone and Joint Surgery | 5.  | Y | 67,968    | 0      |
| Journal of Bone and Joint Surgery | 6.  | N | -         | -      |
| Journal of Bone and Joint Surgery | 7.  | N | -         | -      |
| Journal of Bone and Joint Surgery | 8.  | Y | 191,028   | 6,608  |
| Journal of Bone and Joint Surgery | 9.  | N | -         | -      |
| Journal of Bone and Joint Surgery | 10. | Y | 253       | 0      |
| Journal of Bone and Joint Surgery | 11. | N | -         | -      |
| Journal of Bone and Joint Surgery | 12. | Y | 0         | 0      |
| Journal of Bone and Joint Surgery | 13. | N | -         | -      |
| Journal of Bone and Joint Surgery | 14. | N | -         | -      |
| Journal of Bone and Joint Surgery | 15. | N | -         | -      |
| Journal of Bone and Joint Surgery | 16. | N | -         | -      |
| Journal of Bone and Joint Surgery | 17. | Y | 0         | 12,373 |
| Journal of Bone and Joint Surgery | 18. | Y | 0         | 0      |
| Journal of Bone and Joint Surgery | 19. | Y | 325,860   | 12,045 |
| Journal of Bone and Joint Surgery | 20. | Y | 0         | 0      |
| Journal of Bone and Joint Surgery | 21. | N | -         | -      |
| Journal of Bone and Joint Surgery | 22. | Y | 215,703   | 34,796 |
| Journal of Bone and Joint Surgery | 23. | Y | 2,565     | 0      |
| Journal of Bone and Joint Surgery | 24. | N | -         | -      |
| Journal of Bone and Joint Surgery | 25. | N | -         | -      |
| Journal of Bone and Joint Surgery | 26. | Y | 0         | 0      |
| Journal of Bone and Joint Surgery | 27. | Y | 44        | 0      |
| Journal of Bone and Joint Surgery | 28. | Y | 98        | 0      |
| Journal of Bone and Joint Surgery | 29. | Y | 1,263,234 | 0      |

|                                     |     |   |         |         |
|-------------------------------------|-----|---|---------|---------|
| Journal of Bone and Joint Surgery   | 30. | Y | 121     | 0       |
| Journal of Bone and Joint Surgery   | 31. | Y | 71      | 261,250 |
| Journal of Bone and Joint Surgery   | 32. | Y | 51,250  | 0       |
| Journal of Bone and Joint Surgery   | 33. | Y | 6,207   | 0       |
| Journal of Bone and Joint Surgery   | 34. | Y | 20      | 0       |
| American Journal of Sports Medicine | 1.  | Y | 0       | 0       |
| American Journal of Sports Medicine | 2.  | Y | 15      | 0       |
| American Journal of Ophthalmology   | 1.  | Y | 11,876  | 0       |
| American Journal of Ophthalmology   | 2.  | Y | 151     | 0       |
| American Journal of Ophthalmology   | 3.  | Y | 7,337   | 0       |
| American Journal of Ophthalmology   | 4.  | Y | 2,060   | 0       |
| American Journal of Ophthalmology   | 5.  | Y | 0       | 35,303  |
| American Journal of Ophthalmology   | 6.  | Y | 17,652  | 0       |
| American Journal of Ophthalmology   | 7.  | Y | 100,223 | 0       |
| American Journal of Ophthalmology   | 8.  | N | -       | -       |
| American Journal of Ophthalmology   | 9.  | Y | 5,545   | 8,965   |
| American Journal of Ophthalmology   | 10. | N | -       | -       |
| American Journal of Ophthalmology   | 11. | Y | 511     | 17,920  |
| American Journal of Ophthalmology   | 12. | Y | 14,489  | 51,783  |
| American Journal of Ophthalmology   | 13. | Y | 419     | 0       |
| American Journal of Ophthalmology   | 14. | Y | 320     | 0       |
| American Journal of Ophthalmology   | 15. | Y | 208     | 0       |
| American Journal of Ophthalmology   | 16. | N | -       | -       |
| American Journal of Ophthalmology   | 17. | Y | 0       | 0       |
| American Journal of Ophthalmology   | 18. | Y | 0       | 0       |
| American Journal of Ophthalmology   | 19. | N | -       | -       |
| American Journal of Ophthalmology   | 20. | Y | 0       | 0       |
| American Journal of Ophthalmology   | 21. | Y | 0       | 0       |
| American Journal of Ophthalmology   | 22. | Y | 170     | 0       |
| Ophthalmology                       | 1.  | Y | 0       | 0       |
| Ophthalmology                       | 2.  | Y | 181     | 0       |
| Ophthalmology                       | 3.  | Y | 80      | 0       |

|               |     |   |         |   |
|---------------|-----|---|---------|---|
| Ophthalmology | 4.  | Y | 8,000   | 0 |
| Ophthalmology | 5.  | Y | 1,760   | 0 |
| Ophthalmology | 6.  | N | -       | - |
| Ophthalmology | 7.  | Y | 119,331 | 0 |
| Ophthalmology | 8.  | N | -       | - |
| Ophthalmology | 9.  | N | -       | - |
| Ophthalmology | 10. | Y | 4,971   | 0 |
| Ophthalmology | 11. | Y | 0       | 0 |
| Ophthalmology | 12. | N | -       | - |
| Ophthalmology | 13. | Y | 0       | 0 |
| Ophthalmology | 14. | Y | 2,098   | 0 |
| Ophthalmology | 15. | N | -       | - |
| Ophthalmology | 16. | N | -       | - |
| Ophthalmology | 17. | Y | 4,221   | 0 |
| Ophthalmology | 18. | Y | 4,904   | 0 |
| Ophthalmology | 19. | Y | 5,530   | 0 |
| Ophthalmology | 20. | N | -       | - |
| Ophthalmology | 21. | Y | 0       | 0 |
| Ophthalmology | 22. | Y | 0       | 0 |
| Ophthalmology | 23. | N | -       | - |
| Ophthalmology | 24. | Y | 0       | 0 |
| Ophthalmology | 25. | N | -       | - |
| Ophthalmology | 26. | Y | 0       | 0 |
| Ophthalmology | 27. | Y | 0       | 0 |
| Ophthalmology | 28. | Y | 0       | 0 |
| Ophthalmology | 29. | Y | 0       | 0 |
| Ophthalmology | 30. | Y | 0       | 0 |
| Ophthalmology | 31. | Y | 0       | 0 |
| Ophthalmology | 32. | Y | 0       | 0 |
| Ophthalmology | 33. | Y | 0       | 0 |
| Ophthalmology | 34. | Y | 0       | 0 |
| Ophthalmology | 35. | Y | 0       | 0 |

|                                          |     |   |        |         |
|------------------------------------------|-----|---|--------|---------|
| Journal of the National Cancer Institute | 1.  | Y | 72     | 0       |
| Journal of the National Cancer Institute | 2.  | Y | 0      | 0       |
| Journal of the National Cancer Institute | 3.  | Y | 0      | 70,752  |
| Journal of the National Cancer Institute | 4.  | Y | 0      | 0       |
| Journal of the National Cancer Institute | 5.  | N | -      | -       |
| Journal of the National Cancer Institute | 6.  | N | -      | -       |
| Journal of the National Cancer Institute | 7.  | N | -      | -       |
| Journal of the National Cancer Institute | 8.  | N | -      | -       |
| Journal of the National Cancer Institute | 9.  | N | -      | -       |
| Journal of the National Cancer Institute | 10. | Y | 0      | 0       |
| Journal of the National Cancer Institute | 11. | Y | 0      | 0       |
| Journal of the National Cancer Institute | 12. | Y | 26,388 | 236,895 |
| Journal of the National Cancer Institute | 13. | N | -      | -       |
| Journal of the National Cancer Institute | 14. | N | -      | -       |
| Journal of the National Cancer Institute | 15. | Y | 3,951  | 0       |
| Journal of the National Cancer Institute | 16. | N | -      | -       |
| Journal of the National Cancer Institute | 17. | Y | 0      | 37      |
| Journal of the National Cancer Institute | 18. | Y | 0      | 0       |
| Journal of the National Cancer Institute | 19. | Y | 0      | 0       |
| Journal of the National Cancer Institute | 20. | Y | 0      | 0       |
| Journal of the National Cancer Institute | 21. | Y | 0      | 0       |
| Journal of the National Cancer Institute | 22. | N | 14     | 0       |
| Journal of the National Cancer Institute | 23. | N | -      | -       |
| Journal of the National Cancer Institute | 24. | N | -      | -       |
| Journal of the National Cancer Institute | 25. | Y | 0      | 0       |
| Journal of the National Cancer Institute | 26. | N | -      | -       |
| Journal of the National Cancer Institute | 27. | Y | 7,882  | 362,078 |
| Journal of the National Cancer Institute | 28. | N | -      | -       |
| Journal of the National Cancer Institute | 29. | Y | 27     | 0       |
| Journal of the National Cancer Institute | 30. | Y | 0      | 0       |
| Journal of the National Cancer Institute | 31. | N | -      | -       |
| Journal of the National Cancer Institute | 32. | Y | 0      | 0       |

|                                          |     |   |        |         |
|------------------------------------------|-----|---|--------|---------|
| Journal of the National Cancer Institute | 33. | Y | 77     | 0       |
| Journal of the National Cancer Institute | 34. | N | -      | -       |
| Journal of the National Cancer Institute | 35. | N | -      | -       |
| Journal of the National Cancer Institute | 36. | N | -      | -       |
| Journal of the National Cancer Institute | 37. | Y | 0      | 0       |
| Journal of the National Cancer Institute | 38. | Y | 76     | 0       |
| Journal of the National Cancer Institute | 39. | Y | 366    | 191     |
| Journal of the National Cancer Institute | 40. | Y | 567    | 0       |
| Journal of the National Cancer Institute | 41. | Y | 53,049 | 0       |
| Journal of the National Cancer Institute | 42. | Y | 49     | 0       |
| Journal of the National Cancer Institute | 43. | Y | 471    | 9158    |
| Journal of the National Cancer Institute | 44. | Y | 57,282 | 545,001 |
| Journal of the National Cancer Institute | 45. | Y | 7294   | 599,967 |
| Journal of the National Cancer Institute | 46. | Y | 39,106 | 0       |
| Journal of the National Cancer Institute | 47. | N | -      | -       |
| Journal of the National Cancer Institute | 48. | Y | 1,055  | 0       |
| Journal of the National Cancer Institute | 49. | Y | 115    | 0       |
| Journal of the National Cancer Institute | 50. | Y | 4,375  | 0       |
| Journal of the National Cancer Institute | 51. | N | -      | -       |
| Journal of the National Cancer Institute | 52. | Y | 0      | 0       |
| Journal of the National Cancer Institute | 53. | Y | 153    | 0       |
| Journal of the National Cancer Institute | 54. | Y | 0      | 0       |
| Journal of the National Cancer Institute | 55. | Y | 0      | 0       |
| Journal of the National Cancer Institute | 56. | Y | 0      | 0       |
| Journal of the National Cancer Institute | 57. | Y | 0      | 0       |
| Journal of the National Cancer Institute | 58. | Y | 0      | 0       |
| Journal of the National Cancer Institute | 59. | Y | 0      | 0       |
| Journal of the National Cancer Institute | 60. | Y | 0      | 0       |
| Journal of the National Cancer Institute | 61. | Y | 0      | 0       |
| Journal of the National Cancer Institute | 62. | Y | 281    | 0       |
| Journal of the National Cancer Institute | 63. | Y | 0      | 0       |
| Journal of the National Cancer Institute | 64. | N | -      | -       |

|                                          |     |   |        |           |
|------------------------------------------|-----|---|--------|-----------|
| Journal of the National Cancer Institute | 65. | N | -      | -         |
| Journal of the National Cancer Institute | 66. | Y | 21,693 | 176,298   |
| Journal of the National Cancer Institute | 67. | Y | 0      | 0         |
| Journal of the National Cancer Institute | 68. | Y | 13     | 0         |
| Journal of the National Cancer Institute | 69. | Y | 25,107 | 0         |
| Journal of the National Cancer Institute | 70. | Y | 0      | 0         |
| Journal of the National Cancer Institute | 71. | Y | 0      | 0         |
| Journal of the National Cancer Institute | 72. | Y | 1,200  | 218,126   |
| Journal of the National Cancer Institute | 73. | Y | 12     | 0         |
| Journal of the National Cancer Institute | 74. | Y | 11     | 0         |
| Journal of the National Cancer Institute | 75. | Y | 0      | 0         |
| Journal of the National Cancer Institute | 76. | N | -      | -         |
| Journal of the National Cancer Institute | 77. | N | -      | -         |
| Journal of the National Cancer Institute | 78. | Y | 0      | 0         |
| Journal of the National Cancer Institute | 79. | Y | 0      | 0         |
| Journal of the National Cancer Institute | 80. | Y | 125    | 0         |
| Journal of the National Cancer Institute | 81. | N | -      | -         |
| Journal of the National Cancer Institute | 82. | Y | 51,760 | 2,342,998 |
| Journal of the National Cancer Institute | 83. | Y | 1,500  | 0         |
| Journal of the National Cancer Institute | 84. | N | -      | -         |
| Journal of the National Cancer Institute | 85. | N | -      | -         |
| Journal of Clinical Oncology             | 1.  | Y | 14     | 0         |
| Journal of Clinical Oncology             | 2.  | N | -      | -         |
| Journal of Clinical Oncology             | 3.  | N | -      | -         |
| Journal of Clinical Oncology             | 4.  | N | -      | -         |
| Journal of Clinical Oncology             | 5.  | Y | 18,943 | 63,997    |
| Journal of Clinical Oncology             | 6.  | Y | 0      | 0         |
| Journal of Clinical Oncology             | 7.  | N | -      | -         |
| Journal of Clinical Oncology             | 8.  | N | -      | -         |
| Journal of Clinical Oncology             | 9.  | Y | 0      | 0         |
| Journal of Clinical Oncology             | 10. | N | -      | -         |
| Journal of Clinical Oncology             | 11. | N | -      | -         |

|                              |     |   |        |         |
|------------------------------|-----|---|--------|---------|
| Journal of Clinical Oncology | 12. | N | -      | -       |
| Journal of Clinical Oncology | 13. | N | -      | -       |
| Journal of Clinical Oncology | 14. | N | -      | -       |
| Journal of Clinical Oncology | 15. | Y | 22,904 | 189,479 |
| Journal of Clinical Oncology | 16. | Y | 0      | 0       |
| Journal of Clinical Oncology | 17. | Y | 5,355  | 899,855 |
| Journal of Clinical Oncology | 18. | N | -      | -       |
| Journal of Clinical Oncology | 19. | Y | 443    | 129,104 |
| Journal of Clinical Oncology | 20. | Y | 0      | 0       |
| Journal of Clinical Oncology | 21. | N | -      | -       |
| Journal of Clinical Oncology | 22. | Y | 0      |         |
| Journal of Clinical Oncology | 23. | N | -      | -       |
| Journal of Clinical Oncology | 24. | Y | 0      | 0       |
| Journal of Clinical Oncology | 25. | N | -      | -       |
| Journal of Clinical Oncology | 26. | N | -      | -       |
| Journal of Clinical Oncology | 27. | N | -      | -       |
| Journal of Clinical Oncology | 28. | Y | 70     | 0       |
| Journal of Clinical Oncology | 29. | N | -      | -       |
| Journal of Clinical Oncology | 30. | N | -      | -       |
| Journal of Clinical Oncology | 31. | N | -      | -       |
| Journal of Clinical Oncology | 32. | Y | 0      | 0       |
| Journal of Clinical Oncology | 33. | Y | 80     | 0       |
| Journal of Clinical Oncology | 34. | Y | 0      | 0       |
| Journal of Clinical Oncology | 35. | N | -      | -       |
| Journal of Clinical Oncology | 36. | N | -      | -       |
| Journal of Clinical Oncology | 37. | N | -      | -       |
| Journal of Clinical Oncology | 38. | Y | 0      | 0       |
| Journal of Clinical Oncology | 39. | N | -      | -       |
| Journal of Clinical Oncology | 40. | Y | 0      | 0       |
| Journal of Clinical Oncology | 41. | N | -      | -       |
| Journal of Clinical Oncology | 42. | Y | 0      | 0       |
| Journal of Clinical Oncology | 43. | N | -      | -       |

|                                        |     |   |         |         |
|----------------------------------------|-----|---|---------|---------|
| Journal of Clinical Oncology           | 44. | Y | 0       | 0       |
| Journal of Clinical Oncology           | 45. | Y | 0       | 0       |
| Journal of Clinical Oncology           | 46. | Y | 0       | 0       |
| American Journal of Surgical Pathology | 1.  | Y | 0       | 0       |
| Gastroenterology                       | 1.  | Y | 0       | 0       |
| Gastroenterology                       | 2.  | Y | 970     | 0       |
| Gastroenterology                       | 3.  | N | -       | -       |
| Gastroenterology                       | 4.  | Y | 0       | 0       |
| Gastroenterology                       | 5.  | Y | 0       | 0       |
| Gastroenterology                       | 6.  | Y | 0       | 0       |
| Gastroenterology                       | 7.  | Y | 161,705 | 4,421   |
| Gastroenterology                       | 8.  | Y | 0       | 0       |
| Gastroenterology                       | 9.  | Y | 12,474  | 1,262   |
| Gastroenterology                       | 10. | Y | 7,211   | 0       |
| Gastroenterology                       | 11. | Y | 0       | 0       |
| Gastroenterology                       | 12. | Y | 0       | 0       |
| Gastroenterology                       | 13. | Y | 0       | 0       |
| Gastroenterology                       | 14. | N | -       | -       |
| Gastroenterology                       | 15. | Y | 96,070  | 28,587  |
| Gastroenterology                       | 16. | N | -       | -       |
| Gastroenterology                       | 17. | Y | 0       | 0       |
| Gastroenterology                       | 18. | Y | 19,652  | 16,984  |
| Gastroenterology                       | 19. | Y | 0       | 0       |
| Gastroenterology                       | 20. | N | -       | -       |
| Gastroenterology                       | 21. | N | -       | -       |
| American Journal of Gastroenterology   | 1.  | Y | 8,805   | 415,949 |
| American Journal of Gastroenterology   | 2.  | Y | 45,473  | 0       |
| American Journal of Gastroenterology   | 3.  | N | -       | -       |
| American Journal of Gastroenterology   | 4.  | Y | 0       | 0       |
| American Journal of Gastroenterology   | 5.  | Y | 20      | 0       |
| American Journal of Gastroenterology   | 6.  | Y | 41,701  | 125,800 |
| American Journal of Gastroenterology   | 7.  | Y | 20,119  | 0       |



|                                      |     |   |         |         |
|--------------------------------------|-----|---|---------|---------|
| American Journal of Gastroenterology | 8.  | Y | 108     | 0       |
| American Journal of Gastroenterology | 9.  | Y | 128,655 | 400     |
| American Journal of Gastroenterology | 10. | Y | 0       | 0       |
| American Journal of Gastroenterology | 11. | Y | 0       | 0       |
| American Journal of Gastroenterology | 12. | Y | 0       | 0       |
| American Journal of Gastroenterology | 13. | Y | 17,676  | 0       |
| American Journal of Gastroenterology | 14. | Y | 22,656  | 0       |
| American Journal of Gastroenterology | 15. | Y | 2,894   | 0       |
| American Journal of Gastroenterology | 16. | Y | 2,921   | 123,142 |
| American Journal of Gastroenterology | 17. | Y | 0       | 0       |
| American Journal of Gastroenterology | 18. | N | -       | -       |
| American Journal of Gastroenterology | 19. | Y | 37,206  | 64,119  |
| American Journal of Gastroenterology | 20. | Y | 13,379  | 237,157 |
| American Journal of Gastroenterology | 21. | Y | 421     | 0       |
| American Journal of Gastroenterology | 22. | Y | 28,775  | 0       |
| American Journal of Gastroenterology | 23. | Y | 24,369  | 0       |
| American Journal of Gastroenterology | 24. | Y | 17,000  | 0       |
| American Journal of Gastroenterology | 25. | Y | 0       | 0       |
| American Journal of Gastroenterology | 26. | Y | 78      | 0       |
| American Journal of Gastroenterology | 27. | N | -       | -       |
| American Journal of Gastroenterology | 28. | Y | 214,053 | 103,539 |
| American Journal of Gastroenterology | 29. | Y | 29      | 345,706 |
| American Journal of Gastroenterology | 30. | N | -       | -       |
| American Journal of Gastroenterology | 31. | N | -       | -       |
| American Journal of Gastroenterology | 32. | N | -       | -       |
| American Journal of Gastroenterology | 33. | N | -       | -       |
| American Journal of Gastroenterology | 34. | N | -       | -       |
| Annals of Neurology                  | 1.  | Y | 0       | 0       |
| Annals of Neurology                  | 2.  | Y | 8,504   | 102,500 |
| Annals of Neurology                  | 3.  | Y | 0       | 0       |
| Annals of Neurology                  | 4.  | Y | 0       | 0       |
| Annals of Neurology                  | 5.  | Y | 4,559   | 0       |

|                                                |     |   |         |         |
|------------------------------------------------|-----|---|---------|---------|
| Annals of Neurology                            | 6.  | Y | 0       | 0       |
| Annals of Neurology                            | 7.  | Y | 42      | 0       |
| Annals of Neurology                            | 8.  | Y | 11      | 0       |
| Annals of Neurology                            | 9.  | Y | 0       | 0       |
| Annals of Neurology                            | 10. | Y | 10      | 0       |
| JAMA Neurology                                 | 1.  | Y | 0       | 0       |
| JAMA Neurology                                 | 2.  | Y | 4,716   | 41,226  |
| JAMA Neurology                                 | 3.  | Y | 44      | 611,049 |
| JAMA Neurology                                 | 4.  | Y | 133     | 0       |
| JAMA Neurology                                 | 5.  | Y | 51      | 0       |
| JAMA Neurology                                 | 6.  | Y | 0       | 0       |
| JAMA Neurology                                 | 7.  | Y | 0       | 0       |
| JAMA Neurology                                 | 8.  | Y | 6,079   | 0       |
| JAMA Neurology                                 | 9.  | Y | 20,887  | 11,100  |
| Journal of the American Academy of Dermatology | 1.  | Y | 6,901   | 0       |
| Journal of the American Academy of Dermatology | 2.  | Y | 24      | 0       |
| Journal of the American Academy of Dermatology | 3.  | Y | 0       | 0       |
| Journal of the American Academy of Dermatology | 4.  | Y | 0       | 0       |
| Journal of the American Academy of Dermatology | 5.  | Y | 6,359   | 0       |
| Journal of the American Academy of Dermatology | 6.  | Y | 108,590 | 74,923  |
| Journal of the American Academy of Dermatology | 7.  | Y | 240     | 3,422   |
| Journal of the American Academy of Dermatology | 8.  | Y | 0       | 0       |
| Journal of the American Academy of Dermatology | 9.  | Y | 111     | 0       |
| JAMA Dermatology                               | 1.  | Y | 0       | 0       |
| JAMA Dermatology                               | 2.  | Y | 3088    | 0       |
| Journal of Urology                             | 1.  | Y | 90      | 0       |
| Journal of Urology                             | 2.  | Y | 669     | 0       |
| Journal of Urology                             | 3.  | N | -       | -       |
| Journal of Urology                             | 4.  | Y | 31      | 0       |
| Journal of Urology                             | 5.  | Y | 26,389  | 0       |
| Prostate                                       | 1.  | N | -       | -       |
| Prostate                                       | 2.  | Y | 0       | 490     |

|                                               |     |   |        |        |
|-----------------------------------------------|-----|---|--------|--------|
| Prostate                                      | 3.  | N | -      | -      |
| Journal of the American Society of Nephrology | 1.  | Y | 0      | 0      |
| Journal of the American Society of Nephrology | 2.  | Y | 9,738  | 0      |
| Journal of the American Society of Nephrology | 3.  | Y | 99     | 0      |
| Journal of the American Society of Nephrology | 4.  | Y | 1,797  | 0      |
| Journal of the American Society of Nephrology | 5.  | Y | 11,948 | 28,276 |
| Journal of the American Society of Nephrology | 6.  | Y | 15,590 | 94,284 |
| Journal of the American Society of Nephrology | 7.  | Y | 25,679 | 1,689  |
| Journal of the American Society of Nephrology | 8.  | Y | 2,434  | 23     |
| Journal of the American Society of Nephrology | 9.  | Y | 359    | 0      |
| Journal of the American Society of Nephrology | 10. | Y | 0      | 0      |
| Journal of the American Society of Nephrology | 11. | Y | 295    | 0      |
| Journal of the American Society of Nephrology | 12. | Y | 94     | 0      |
| Journal of the American Society of Nephrology | 13. | Y | 36,479 | 0      |
| Journal of the American Society of Nephrology | 14. | Y | 474    | 0      |
| Journal of the American Society of Nephrology | 15. | Y | 0      | 0      |
| Journal of the American Society of Nephrology | 16. | N | -      | -      |
| Journal of the American Society of Nephrology | 17. | N | -      | -      |
| Kidney International                          | 1.  | Y | 0      | 0      |
| Kidney International                          | 2.  | Y | 131    | 0      |
| Kidney International                          | 3.  | N | -      | -      |
| Kidney International                          | 4.  | N | -      | -      |
| Kidney International                          | 5.  | N | -      | -      |
| Kidney International                          | 6.  | N | -      | -      |
| Kidney International                          | 7.  | N | -      | -      |
| Kidney International                          | 8.  | Y | 2,038  | 56,366 |
| Kidney International                          | 9.  | N | -      | -      |
| Kidney International                          | 10. | Y | 78     | 0      |
| Kidney International                          | 11. | Y | 0      | 0      |
| Otolaryngology Head and Neck                  | 1.  | Y | 18     | 0      |
| Otolaryngology Head and Neck                  | 2.  | Y | 6,700  | 0      |
| Otolaryngology Head and Neck                  | 3.  | Y | 18     | 0      |

|                              |     |   |        |         |
|------------------------------|-----|---|--------|---------|
| Otolaryngology Head and Neck | 4.  | Y | 0      | 0       |
| Otolaryngology Head and Neck | 5.  | Y | 174    | 0       |
| Otolaryngology Head and Neck | 6.  | Y | 5,776  | 0       |
| Otolaryngology Head and Neck | 7.  | Y | 122    | 0       |
| Otolaryngology Head and Neck | 8.  | Y | 169    | 0       |
| Otolaryngology Head and Neck | 9.  | Y | 50     | 0       |
| Otolaryngology Head and Neck | 10. | Y | 0      | 0       |
| Otolaryngology Head and Neck | 11. | Y | 810    | 0       |
| Otolaryngology Head and Neck | 12. | Y | 458    | 0       |
| Otolaryngology Head and Neck | 13. | Y | 114    | 0       |
| Otolaryngology Head and Neck | 14. | Y | 91     | 0       |
| Otolaryngology Head and Neck | 15. | N | -      | -       |
| Otolaryngology Head and Neck | 16. | Y | 89     | 0       |
| Otolaryngology Head and Neck | 17. | Y | 336    | 0       |
| Otolaryngology Head and Neck | 18. | Y | 1,094  | 0       |
| Otolaryngology Head and Neck | 19. | Y | 11     | 0       |
| Head and Neck                | 1.  | Y | 3,815  | 0       |
| Head and Neck                | 2.  | Y | 1,667  | 0       |
| Head and Neck                | 3.  | Y | 7,882  | 362,078 |
| Head and Neck                | 4.  | Y | 0      | 0       |
| Head and Neck                | 5.  | Y | 50,203 | 60,119  |
| Head and Neck                | 6.  | N | -      | -       |
| Head and Neck                | 7.  | Y | 219    | 0       |
| Head and Neck                | 8.  | Y | 7,8    | 0       |
| Head and Neck                | 9.  | Y | 0      | 0       |
| Head and Neck                | 10. | Y | 1,114  | 0       |
| Head and Neck                | 11. | Y | 4,171  | 146,000 |
| Head and Neck                | 12. | N | -      | -       |
| Head and Neck                | 13. | Y | 0      | 0       |
| Head and Neck                | 14. | Y | 4,777  | 0       |
| Head and Neck                | 15. | Y | 5,776  | 0       |
| Head and Neck                | 16. | Y | 141    | 0       |

|                                |     |   |        |         |
|--------------------------------|-----|---|--------|---------|
| Head and Neck                  | 17. | N | -      | -       |
| Head and Neck                  | 18. | N | -      | -       |
| Head and Neck                  | 19. | N | -      | -       |
| Head and Neck                  | 20. | N | -      | -       |
| Head and Neck                  | 21. | N | -      | -       |
| Head and Neck                  | 22. | N | -      | -       |
| Clinical infectious diseases   | 1.  | Y | 42,007 | 0       |
| Clinical infectious diseases   | 2.  | Y | 0      | 0       |
| Clinical infectious diseases   | 3.  | Y | 0      | 5,391   |
| Clinical infectious diseases   | 4.  | Y | 0      | 29,645  |
| Clinical infectious diseases   | 5.  | Y | 0      | 0       |
| Clinical infectious diseases   | 6.  | Y | 450    | 0       |
| Clinical infectious diseases   | 7.  | Y | 115    | 0       |
| Clinical infectious diseases   | 8.  | Y | 89     | 0       |
| Clinical infectious diseases   | 9.  | Y | 1,400  | 0       |
| Clinical infectious diseases   | 10. | Y | 13     | 0       |
| Clinical infectious diseases   | 11. | Y | 40,131 | 9,946   |
| Clinical infectious diseases   | 12. | Y | 0      | 0       |
| Clinical infectious diseases   | 13. | Y | 0      | 0       |
| Clinical infectious diseases   | 14. | Y | 6,205  | 0       |
| Journal of infectious diseases | 1.  | Y | 0      | 0       |
| Journal of infectious diseases | 2.  | Y | 0      | 0       |
| Journal of infectious diseases | 3.  | Y | 0      | 0       |
| Journal of infectious diseases | 4.  | N | -      | -       |
| Journal of infectious diseases | 5.  | Y | 960    | 106,738 |
| Journal of infectious diseases | 6.  | Y | 0      | 0       |
| Journal of infectious diseases | 7.  | Y | 0      | 0       |
| Journal of infectious diseases | 8.  | Y | 46,039 | 14,583  |
| Journal of infectious diseases | 9.  | Y | 0      | 0       |
| Journal of infectious diseases | 10. | Y | 10,753 | 0       |
| Journal of infectious diseases | 11. | Y | 3,645  | 104,896 |
| Journal of infectious diseases | 12. | Y | 0      | 0       |

|                                |     |   |         |           |
|--------------------------------|-----|---|---------|-----------|
| Journal of infectious diseases | 13. | Y | 0       | 0         |
| Journal of infectious diseases | 14. | Y | 512,421 | 1,625     |
| Diabetes Care                  | 1.  | Y | 2,849   | 0         |
| Diabetes Care                  | 2.  | Y | 117,175 | 0         |
| Diabetes Care                  | 3.  | Y | 257,304 | 5,963     |
| Diabetes Care                  | 4.  | Y | 0       | 0         |
| Diabetes Care                  | 5.  | Y | 0       | 0         |
| Diabetes Care                  | 6.  | Y | 0       | 0         |
| Diabetes Care                  | 7.  | Y | 30,219  | 13,982    |
| Diabetes Care                  | 8.  | Y | 0       | 0         |
| Diabetes Care                  | 9.  | Y | 9,017   | 0         |
| Diabetes Care                  | 10. | Y | 164,967 | 32,031    |
| Diabetes Care                  | 11. | Y | 554,162 | 1,978,496 |
| Diabetes Care                  | 12. | Y | 85,433  | 45,882    |
| Diabetes Care                  | 13. | N | -       | -         |
| Diabetes Care                  | 14. | N | -       | -         |
| Diabetes Care                  | 15. | N | -       | -         |
| Diabetes Care                  | 16. | N | -       | -         |
| Diabetes Care                  | 17. | Y | 0       | 0         |
| Diabetes Care                  | 18. | Y | 132,509 | 223,205   |
| Diabetes                       | 1.  | Y | 0       | 0         |
| Diabetes                       | 2.  | Y | 5,397   | 0         |
| Diabetes                       | 3.  | Y | 37      | 49,417    |
| Diabetes                       | 4.  | Y | 0       | 0         |
| Diabetes                       | 5.  | Y | 17,204  | 0         |
| Diabetes                       | 6.  | N | -       | -         |
| Diabetes                       | 7.  | N | -       | -         |
| Diabetes                       | 8.  | Y | 0       |           |
| Diabetes                       | 9.  | Y | 40,647  | 0         |
| Diabetes                       | 10. | N | -       | -         |
| Diabetes                       | 11. | N | -       | -         |
| Diabetes                       | 12. | Y | 86,964  | 1,404     |

|                                                 |     |   |         |         |
|-------------------------------------------------|-----|---|---------|---------|
| Diabetes                                        | 13. | Y | 22,660  | 0       |
| Diabetes                                        | 14. | N | -       | -       |
| Diabetes                                        | 15. | Y | 149     | 1927    |
| Diabetes                                        | 16. | N | -       | -       |
| Diabetes                                        | 17. | N | -       | -       |
| American Journal of Respiriology: Critical Care | 1.  | N | -       | -       |
| American Journal of Respiriology: Critical Care | 2.  | N | -       | -       |
| American Journal of Respiriology: Critical Care | 3.  | Y | 55      | 0       |
| American Journal of Respiriology: Critical Care | 4.  | Y | 0       | 0       |
| American Journal of Respiriology: Critical Care | 5.  | Y | 207,414 | 22,370  |
| American Journal of Respiriology: Critical Care | 6.  | N | -       | -       |
| American Journal of Respiriology: Critical Care | 7.  | Y | 0       | 0       |
| American Journal of Respiriology: Critical Care | 8.  | N | -       | -       |
| American Journal of Respiriology: Critical Care | 9.  | N | -       | -       |
| American Journal of Respiriology: Critical Care | 10. | Y | 17      | 265,521 |
| American Journal of Respiriology: Critical Care | 11. | Y | 41,722  | 46,917  |
| American Journal of Respiriology: Critical Care | 12. | Y | 0       | 0       |
| American Journal of Respiriology: Critical Care | 13. | N | -       | -       |
| American Journal of Respiriology: Critical Care | 14. | N | -       | -       |
| American Journal of Respiriology: Critical Care | 15. | N | -       | -       |
| American Journal of Respiriology: Critical Care | 16. | Y | 0       | 0       |
| American Journal of Respiriology: Critical Care | 17. | Y | 0       | 0       |
| American Journal of Respiriology: Critical Care | 18. | Y | 5,217   | 0       |
| American Journal of Respiriology: Critical Care | 19. | Y | 0       | 0       |
| American Journal of Respiriology: Critical Care | 20. | Y | 0       | 0       |
| American Journal of Respiriology: Critical Care | 21. | Y | 9,899   | 275     |
| American Journal of Respiriology: Critical Care | 22. | N | -       | -       |
| American Journal of Respiriology: Critical Care | 23. | Y | 14      | 0       |
| American Journal of Respiriology: Critical Care | 24. | N | -       | -       |
| American Journal of Respiriology: Critical Care | 25. | N | -       | -       |
| American Journal of Respiriology: Critical Care | 26. | Y | 8287    | 501,761 |
| American Journal of Respiriology: Critical Care | 27. | N | -       | -       |

|                                                 |     |   |        |         |
|-------------------------------------------------|-----|---|--------|---------|
| American Journal of Respiriology: Critical Care | 28. | Y | 29,760 | 621,619 |
| American Journal of Respiriology: Critical Care | 29. | Y | 12,633 | 0       |
| American Journal of Respiriology: Critical Care | 30. | Y | 14,507 | 0       |
| American Journal of Respiriology: Critical Care | 31. | N | -      | -       |
| Chest                                           | 1.  | Y | 18     | 0       |
| Chest                                           | 2.  | Y | 0      | 0       |
| Chest                                           | 3.  | N | -      | -       |
| Chest                                           | 4.  | N | -      | -       |
| Chest                                           | 5.  | Y | 178    | 0       |
| Chest                                           | 6.  | Y | 0      | 0       |
| Chest                                           | 7.  | Y | 0      | 0       |
| Chest                                           | 8.  | Y | 54,453 | 192,196 |
| Chest                                           | 9.  | Y | 1,426  | 0       |
| Chest                                           | 10. | Y | 0      | 0       |
| Chest                                           | 11. | Y | 29,168 | 0       |
| Chest                                           | 12. | Y | 0      | 0       |
| Chest                                           | 13. | Y | 88     | 0       |
| Chest                                           | 14. | N | -      | -       |
| Chest                                           | 15. | Y | 6,679  | 0       |
| Chest                                           | 16. | Y | 305    | 0       |
| Current Opinion in Rheumatology                 |     | Y | 6,890  | 0       |
| Arthritis and Rheumatology                      | 1.  | Y | 0      | 0       |
| Arthritis and Rheumatology                      | 2.  | Y | 852    | 247,046 |
| Arthritis and Rheumatology                      | 3.  | Y | 0      | 0       |
| Arthritis and Rheumatology                      | 4.  | Y | 0      | 0       |
| Arthritis and Rheumatology                      | 5.  | Y | 0      | 0       |
| Arthritis and Rheumatology                      | 6.  | Y | 16,358 | 0       |
| Arthritis and Rheumatology                      | 7.  | Y | 63,870 | 28,624  |
| Arthritis and Rheumatology                      | 8.  | Y | 515    | 338,464 |
| Arthritis and Rheumatology                      | 9.  | Y | 26,099 | 0       |
| Arthritis and Rheumatology                      | 10. | N | -      | -       |
| Arthritis and Rheumatology                      | 11. | N | -      | -       |



|                                                   |     |   |         |         |
|---------------------------------------------------|-----|---|---------|---------|
| Arthritis and Rheumatology                        | 12. | Y | 0       | 0       |
| Arthritis and Rheumatology                        | 13. | Y | 32,796  | 0       |
| Arthritis and Rheumatology                        | 14. | Y | 29,785  | 23,996  |
| Arthritis and Rheumatology                        | 15. | Y | 0       | 0       |
| Arthritis and Rheumatology                        | 16. | Y | 0       | 0       |
| Arthritis and Rheumatology                        | 17. | Y | 12,201  | 0       |
| Arthritis and Rheumatology                        | 18. | Y | 0       |         |
| Arthritis and Rheumatology                        | 19. | Y | 132,001 | 273,133 |
| Arthritis and Rheumatology                        | 20. | Y | 2,500   | 0       |
| Arthritis and Rheumatology                        | 21. | N | -       | -       |
| Arthritis and Rheumatology                        | 22. | Y | 179     | 0       |
| Arthritis and Rheumatology                        | 23. | Y | 355,923 | 266,003 |
| Arthritis and Rheumatology                        | 24. | N | -       | -       |
| Arthritis and Rheumatology                        | 25. | Y | 5,466   | 449,634 |
| Arthritis and Rheumatology                        | 26. | Y | 0       | 0       |
| Arthritis and Rheumatology                        | 27. | Y | 4,063   | 24,358  |
| Arthritis and Rheumatology                        | 28. | Y | 257     | 0       |
| Arthritis and Rheumatology                        | 29. | N | -       | -       |
| Arthritis and Rheumatology                        | 30. | N | -       | -       |
| Arthritis and Rheumatology                        | 31. | Y | 49      | 148     |
| Arthritis and Rheumatology                        | 32. | N | -       | -       |
| Arthritis and Rheumatology                        | 33. | N | -       | -       |
| Arthritis and Rheumatology                        | 34. | N | -       | -       |
| Arthritis and Rheumatology                        | 35. | Y | 0       | 0       |
| Journal for the Association of Geriatrics Society | 1.  | Y | 0       | 0       |
| Journal for the Association of Geriatrics Society | 2.  | Y | 0       | 50,000  |
| Journal for the Association of Geriatrics Society | 3.  | Y | 0       | 0       |
| Journal for the Association of Geriatrics Society | 4.  | Y | 4,223   | 220,589 |
| Journal for the Association of Geriatrics Society | 5.  | Y | 0       | 0       |
| Journal for the Association of Geriatrics Society | 6.  | Y | 0       | 0       |
| Journal for the Association of Geriatrics Society | 7.  | Y | 0       | 0       |
| Journal for the Association of Geriatrics Society | 8.  | Y | 0       | 0       |

|                                                   |     |   |        |         |
|---------------------------------------------------|-----|---|--------|---------|
| Journal for the Association of Geriatrics Society | 9.  | Y | 0      | 0       |
| Journal for the Association of Geriatrics Society | 10. | Y | 0      | 0       |
| Journal for the Association of Geriatrics Society | 11. | Y | 0      | 0       |
| Journal for the Association of Geriatrics Society | 12. | Y | 11,409 | 122,075 |
| Journal for the Association of Geriatrics Society | 13. | Y | 0      | 0       |
| Journal for the Association of Geriatrics Society | 14. | Y | 14     | 0       |
| Journal for the Association of Geriatrics Society | 15. | Y | 0      | 0       |
| Journal for the Association of Geriatrics Society | 16. | Y | 0      | 0       |
| Journal for the Association of Geriatrics Society | 17. | Y | 5,025  | 0       |
| Journal for the Association of Geriatrics Society | 18. | Y | 0      | 75,914  |
| Journal of Gerontology                            | 1.  | N | -      | -       |
| Journal of Gerontology                            | 2.  | Y | 0      | 0       |
| Journal of Gerontology                            | 3.  | Y | 47     | 0       |
| Journal of Gerontology                            | 4.  | Y | 0      | 0       |
| Journal of Gerontology                            | 5.  | Y | 9,915  | 19,700  |
| Journal of Gerontology                            | 6.  | N | -      | -       |
| Journal of Gerontology                            | 7.  | N | -      | -       |
| Journal of Gerontology                            | 8.  | Y | 0      | 0       |
| Journal of Gerontology                            | 9.  | N | -      | -       |
| Journal of Gerontology                            | 10. | N | -      | -       |
| Journal of Gerontology                            | 11. | N | -      | -       |
| Journal of Gerontology                            | 12. | Y | 0      | 0       |
| Journal of Gerontology                            | 13. | N | -      | -       |
| Journal of Gerontology                            | 14. | N | -      | -       |
| Journal of Gerontology                            | 15. | Y | 0      | 0       |
| Journal of Gerontology                            | 16. | N | -      | -       |
| Journal of Gerontology                            | 17. | Y | 0      | 0       |
| Journal of Gerontology                            | 18. | Y | 1,095  | 0       |
| Journal of Gerontology                            | 19. | N | -      | -       |
| Journal of Gerontology                            | 20. | Y | 7,242  | 950     |

Appendix 5. Percentage of editors receiving any general payment (>\$0), by journal specialty (2014)

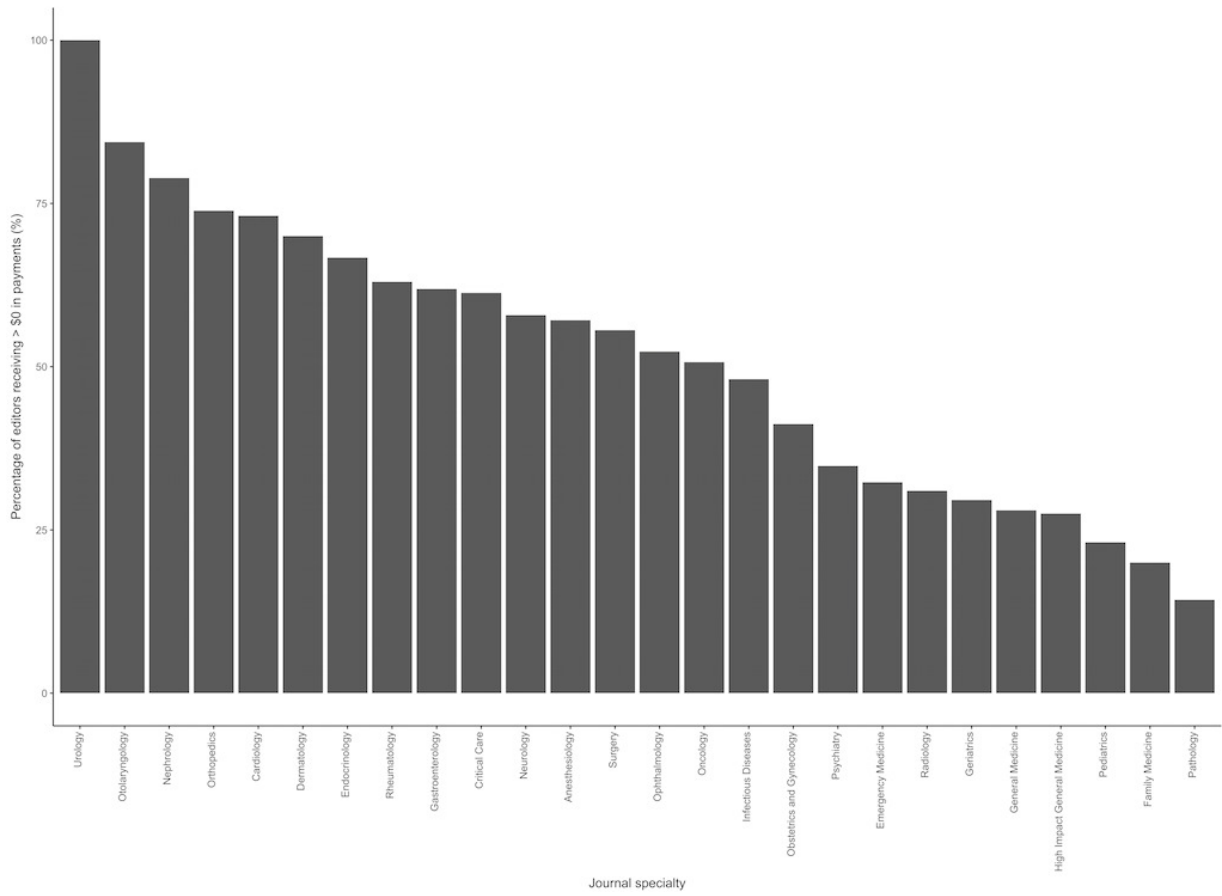

Appendix 6. Percentage of editors receiving any general payment >\$10,000, by journal specialty (2014)

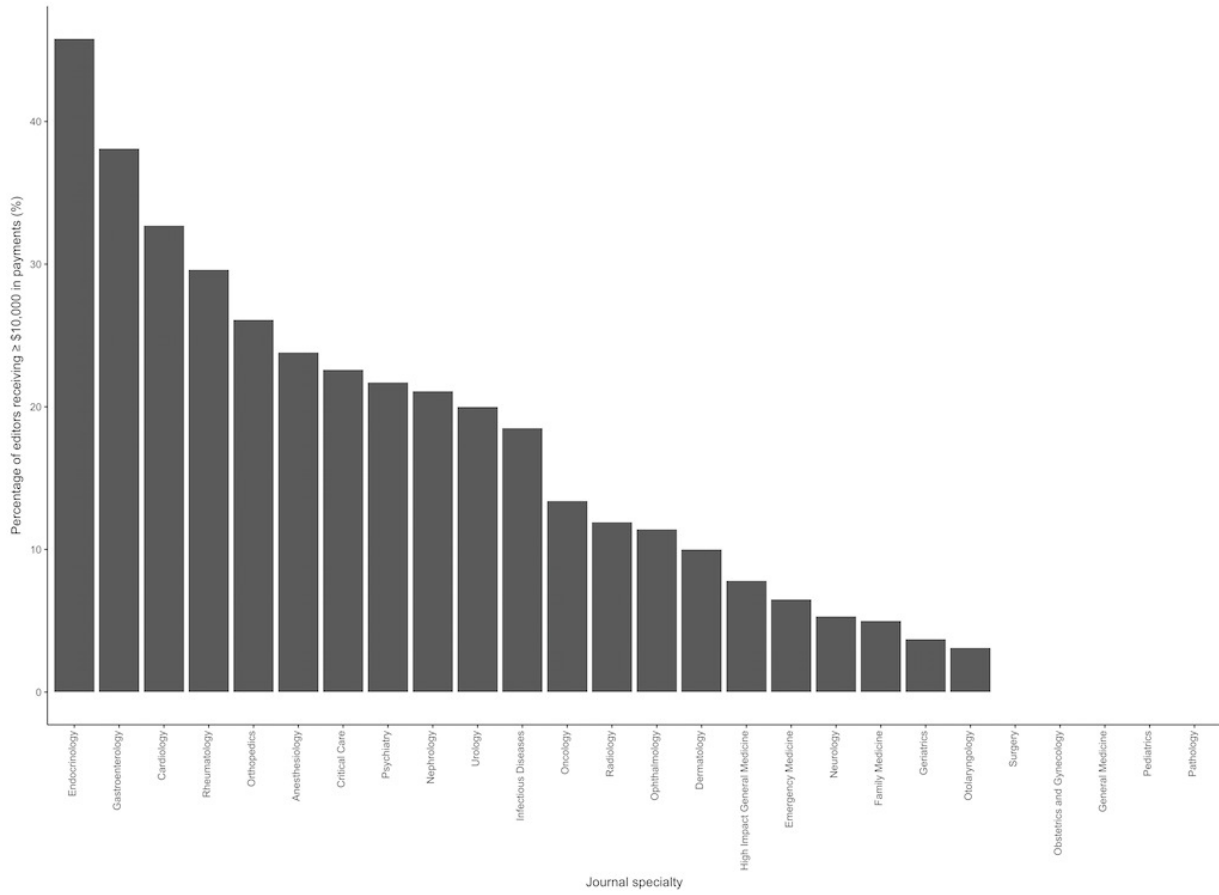

Appendix 7. Percentage of editors receiving any general payment >\$25,000, by journal specialty (2014)

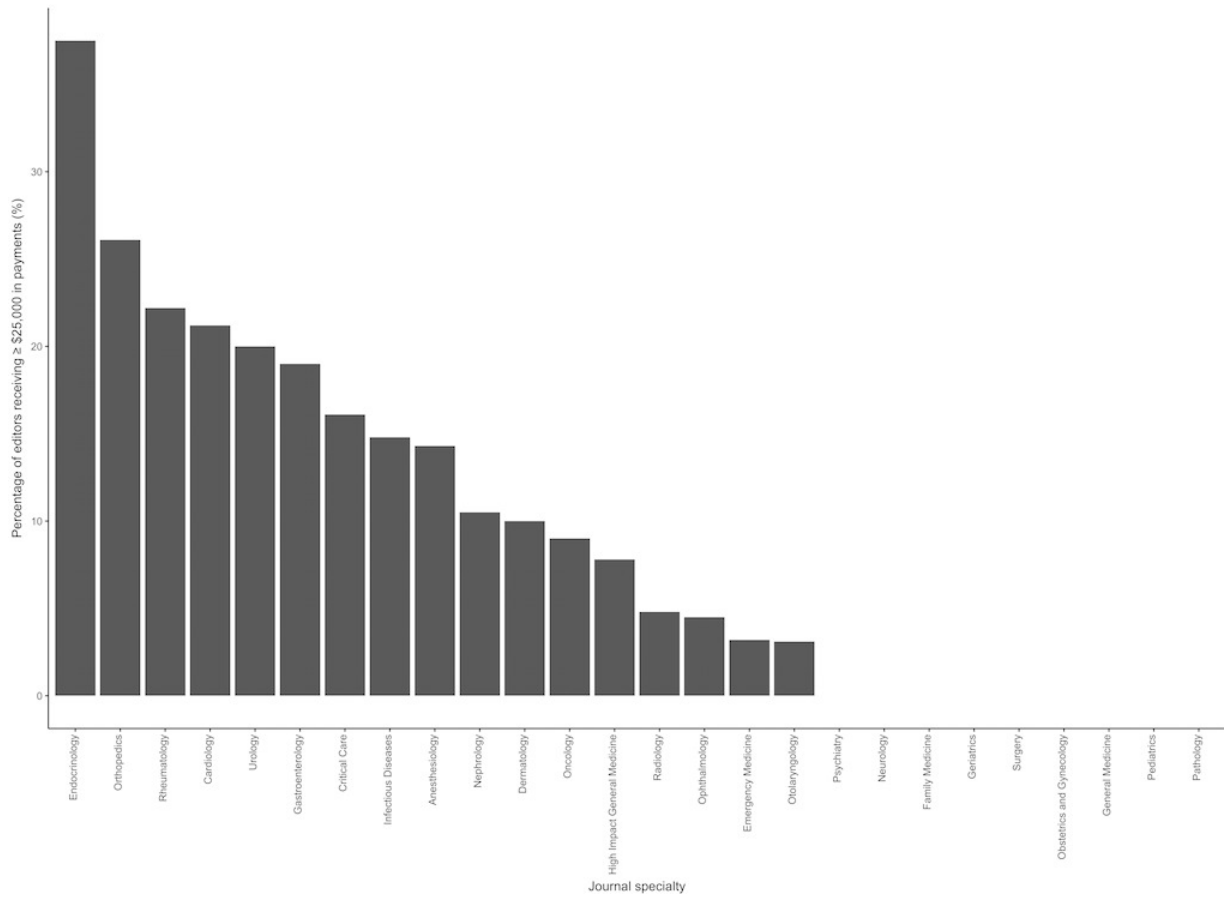

Appendix 8. Percentage of editors receiving any general payment >\$50,000 by journal specialty (2014)

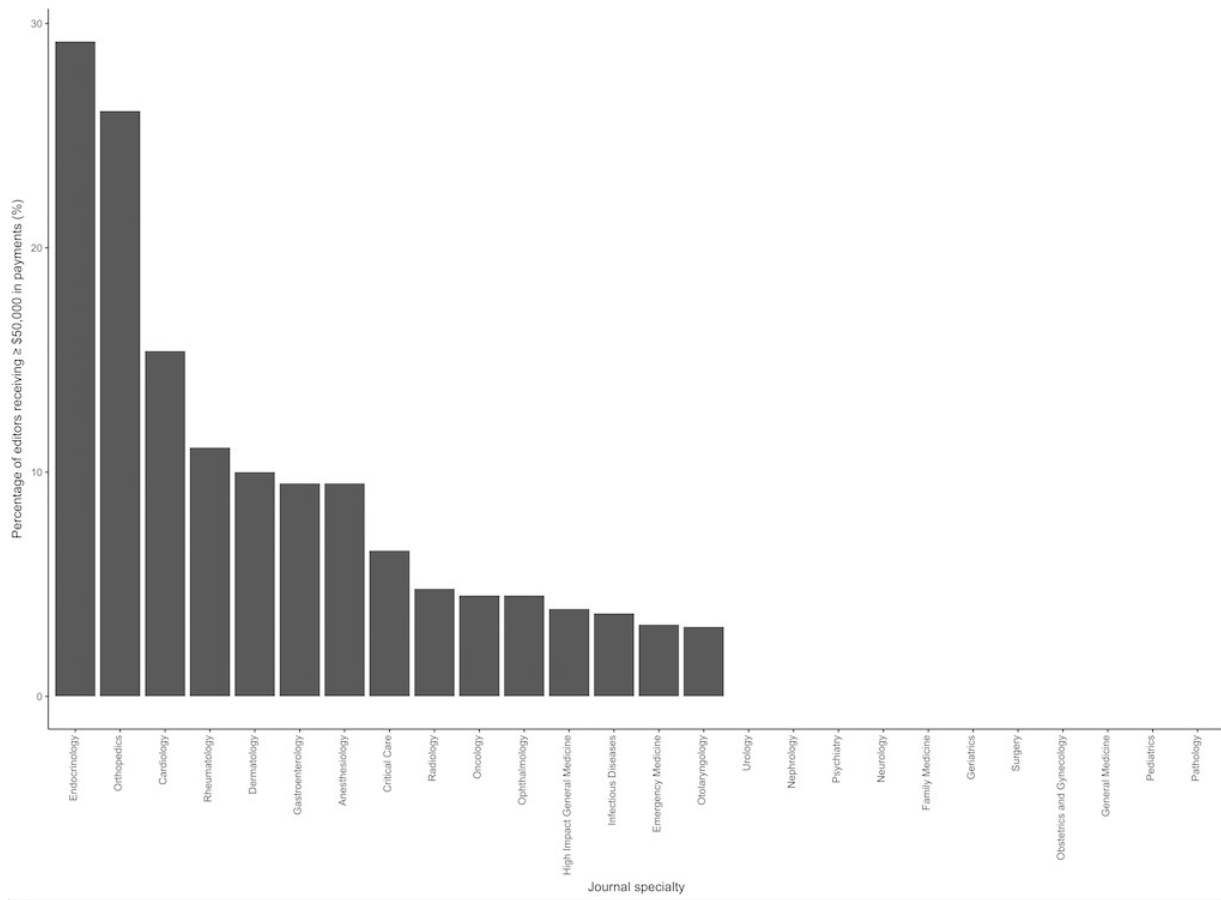

Appendix 9. Percentage of editors receiving any general payment >\$100,000 by journal specialty (2014)

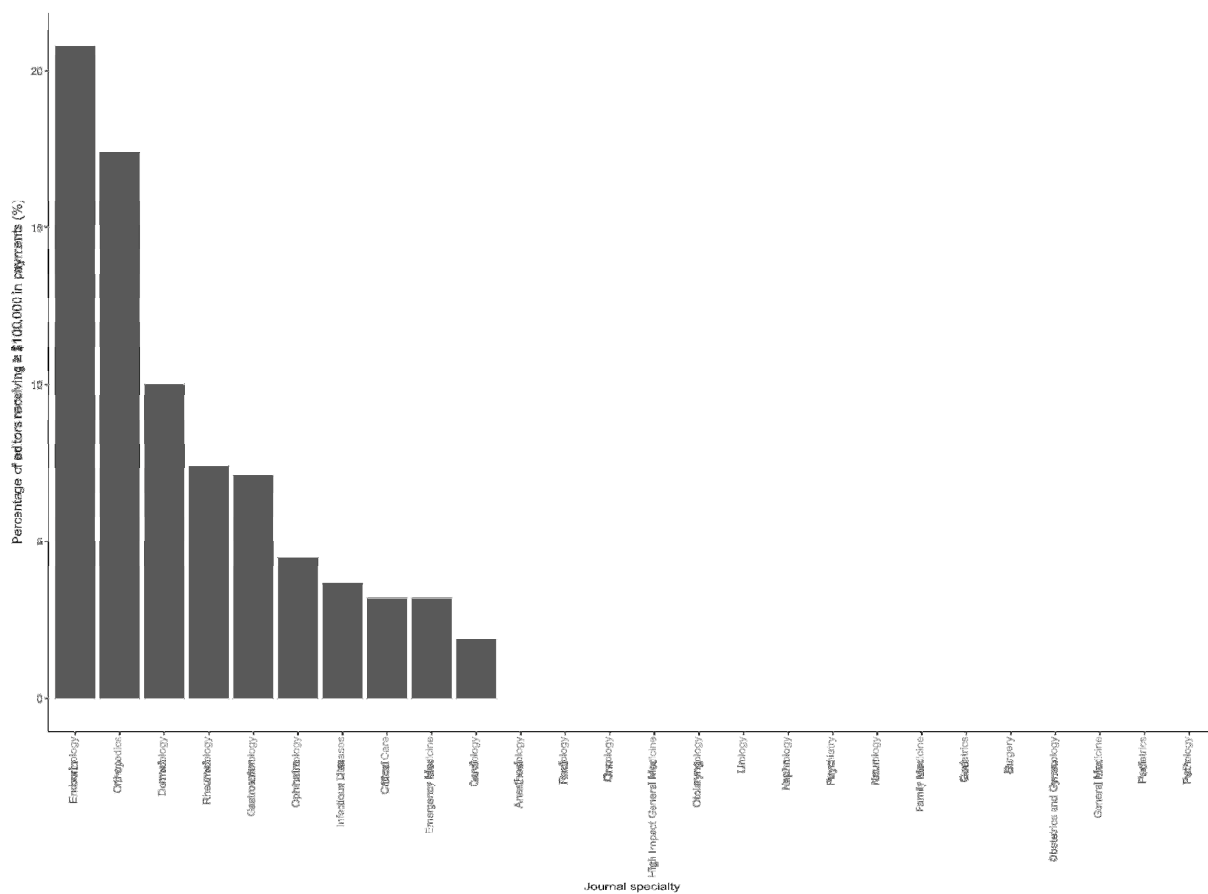

Supplement: liuj039849.ww1.pdf [file liuj039849.ww1.pdf]
